# Supplementary material for: Photovoltage junction memtransistor for optoelectronic in-memory computing
Source: Royal Society of Chemistry journal article supplement (doi:10.1039/d4tc03015j), 2024-01-01
Supplement: d4tc03015j1.pdf [file d4tc03015j1.pdf]

## Supporting Information

### Photovoltage Junction Memtransistor for Optoelectronic In-memory Computing

*Xueming Li, †a Sujuan Wang, †a Yani Yang, a Shankun Xu, a Xueyan Bao, b Lei zhao, a Xueting Liu, a Zhidong Pan, a Yujue Yang\* c, Shichen Su\* a and Nengjie Huo\* a*

<sup>a</sup>Guangdong Provincial Key Laboratory of Chip and Integration Technology, School of Electronic Science and Engineering, South China Normal University, Foshan 528225, P.R. China

<sup>b</sup>RWTH International Academy gGmbH, RWTH Aachen University, Aachen 52074, Germany

<sup>c</sup>School of Physics and Optoelectronic Engineering, Guangdong University of Technology, Guangzhou 510006, China.

<sup>#</sup>These authors contributed equally to this work.

\*Corresponding author

Email: yujue@gdut.edu.cn; [shichensu@scnu.edu.cn](mailto:shichensu@scnu.edu.cn); [njhuo@m.scnu.edu.cn](mailto:njhuo@m.scnu.edu.cn)

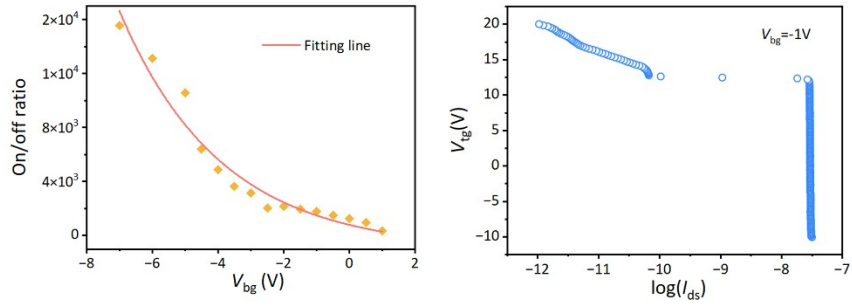

**Figure S1.** Electrical on/off ratio change with  $V_{bg}$  and subthreshold swing (SS) calculation by differential coefficient  $V_{tg}$ - $\log(I_{ds})$  curve.

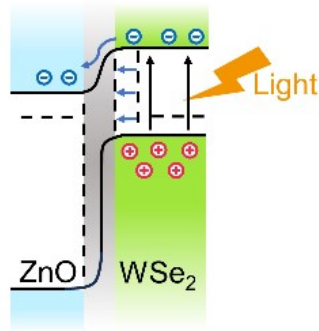

**Figure S2.** Photo-excited electrons and holes transfer in band under light.

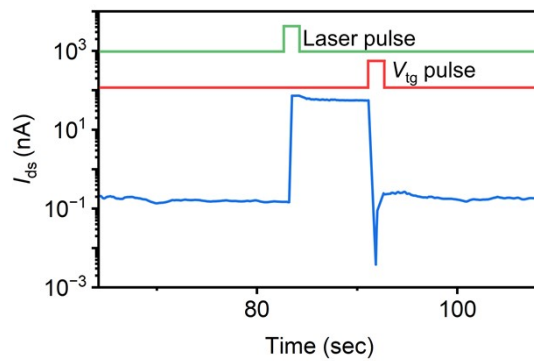

**Figure S3.** The off-current value reverts to the original value after electric erasing.

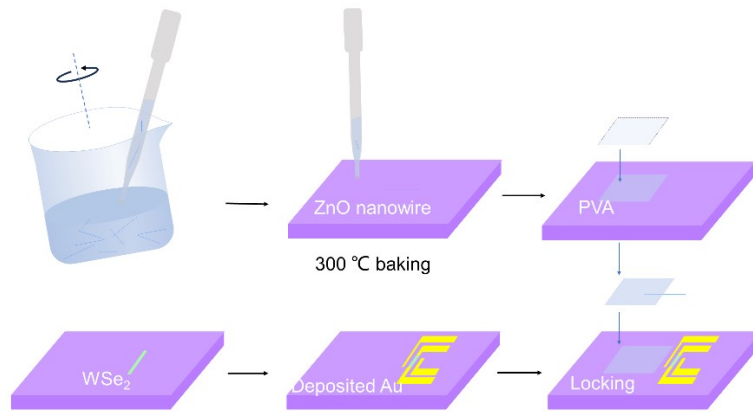

**Figure S4.** the schematic illustration of transfer method of optical memory device based ZnO/WSe<sub>2</sub> Junction Field-effect Transistor.
